# Supplementary material for: Development of a Diverse Learning Experience for Diverse Psychiatry Resident Needs: A Four-Year Biological Psychiatry Curriculum Incorporating Principles of Neurobiology, Psychopharmacology, and Evidence-Based Practice
Source: PubMed Central journal article supplement — Psychiatry Investig. 2017 May 16;14(3):289–97. doi: 10.4306/pi.2017.14.3.289 (PMC5440431; doi:10.4306/pi.2017.14.3.289), 2017-05-16
Supplement: pi-14-289-s001.pdf [file pi-14-289-s001.pdf]

**Supplementary Table 1.** BIOPSY curriculum 2014–2015

| Class session | PGY1                                                                                                    | PGY2-PGY3                                                                   | PGY4                                                                               |
|---------------|---------------------------------------------------------------------------------------------------------|-----------------------------------------------------------------------------|------------------------------------------------------------------------------------|
| 1             |                                                                                                         | Introduction to BIOPSY                                                      |                                                                                    |
| 2             |                                                                                                         | RCTs v. effectiveness trials                                                |                                                                                    |
| 3             |                                                                                                         | Integrated care practice model                                              |                                                                                    |
| 4             |                                                                                                         | Influence of black box warnings on prescribing                              |                                                                                    |
| 5             |                                                                                                         | Medication non-compliance in patients with schizophrenia                    |                                                                                    |
| 6             |                                                                                                         | Weaning of sedative-hypnotics                                               |                                                                                    |
| 7             |                                                                                                         | The effect of stimulants on fear processing                                 |                                                                                    |
| 8             | Systematic reviews/meta-analysis and clinical treatment decision making: Focus on alcohol-use disorders |                                                                             |                                                                                    |
| 9             |                                                                                                         | Tackling medication adherence in outpatient setting                         |                                                                                    |
| 10            |                                                                                                         | Neural contexts for change: from crisis to opportunity                      |                                                                                    |
| 11            |                                                                                                         | Neurobiology of Schizophrenia                                               |                                                                                    |
| 12            | Basic brain anatomy                                                                                     | Patient and caregiver perspectives on dealing with dementia                 | Management of medical illness in the mentally ill                                  |
| 13            | Basic brain anatomy                                                                                     | Treatment of Lewy Body and Parkinson's Dementias                            | Future drug treatments for depression                                              |
| 14            | Pharmacokinetics/Pharmacodynamics                                                                       | Treatment of Alzheimer's Dementia                                           | "Clinical pearls" of insomnia management                                           |
| 15            | Pharmacokinetics/Pharmacodynamics                                                                       | Biomarkers for Alzheimer's Dementia                                         | "Clinical pearls" of prescribing antiepileptics                                    |
| 16            | Neurobiology of depression and future Drug Targets                                                      | Atypical antipsychotics and agitated dementia                               | "Clinical pearls" of psychotropic prescribing in pregnancy and lactation           |
| 17            |                                                                                                         | New drugs in development for Alzheimer's Disease                            |                                                                                    |
| 18            |                                                                                                         | Nicotine dependence and the role of E-cigarettes                            |                                                                                    |
| 19            |                                                                                                         | Biomarkers for suicide                                                      |                                                                                    |
| 20            |                                                                                                         | Use of long-acting injections for medication adherence                      |                                                                                    |
| 21            | Management of Adverse Effects from antidepressants                                                      | Social context of post-traumatic stress disorder (PTSD)                     | "Clinical pearls" of prescribing antidepressants and management of adverse effects |
| 22            | STAR*D overview                                                                                         | Neurobiology of anxiety disorders                                           | "Clinical pearls" of bipolar depression treatment                                  |
| 23            | Future drug targets for schizophrenia                                                                   | Treatment of generalized anxiety disorder with antidepressants (GAD)        | "Clinical pearls" of pain management in the outpatient setting                     |
| 24            | Antipsychotic Mechanism of Action                                                                       | Treatment of post traumatic stress disorder (PTSD)                          | "Clinical pearls" of Suboxone prescribing in the outpatient setting                |
| 25            |                                                                                                         | Psychiatry as a Clinical Neuroscience                                       |                                                                                    |
| 26            | The influence of CATIE and CUTLASS trials on clinical practice                                          | Treatment of obsessive compulsive disorder (OCD)                            | The influence of CATIE and CUTLASS trials on clinical practice                     |
| 27            | Create a treatment algorithm for schizophrenia                                                          | "Clinical pearls" of prescribing benzodiazepines for outpatients with GAD   | "Clinical pearls" of prescribing benzodiazepines for outpatients with GAD          |
| 28            | Clozapine - Part 1                                                                                      | Neuropsychiatric impairments with PTSD and other anxiety spectrum disorders | Clozapine - Part 1                                                                 |
| 29            | Clozapine - Part 2                                                                                      | Neurocircuitry of insomnia and fear                                         | Clozapine - Part 2                                                                 |
| 30            | "Clinical pearls" of methadone prescribing                                                              | Management of insomnia                                                      | "Clinical pearls" of methadone prescribing                                         |
| 31            |                                                                                                         | Untreated psychosis and neurodegeneration                                   |                                                                                    |
| 32            |                                                                                                         | First-episode services availability in first-episode patient                |                                                                                    |
| 33            |                                                                                                         | Treatment of first-episode patients with schizophrenia                      |                                                                                    |

RCTs: Randomized Controlled Trials, STAR\*D: Sequenced Treatment Alternatives to Relieve Depression Study, CATIE: Clinical Antipsychotic Trials of Intervention Effectiveness, CUTLASS: Cost Utility of the Latest Antipsychotic Drugs in Schizophrenia Study
